# Supplementary material
Source: MDPI journal article supplement (https://www.mdpi.com/1996-1073/15/15/5326)
Supplement: s1 [file s1 › energies-1767892-supplementary.pdf]

## Supplementary Material

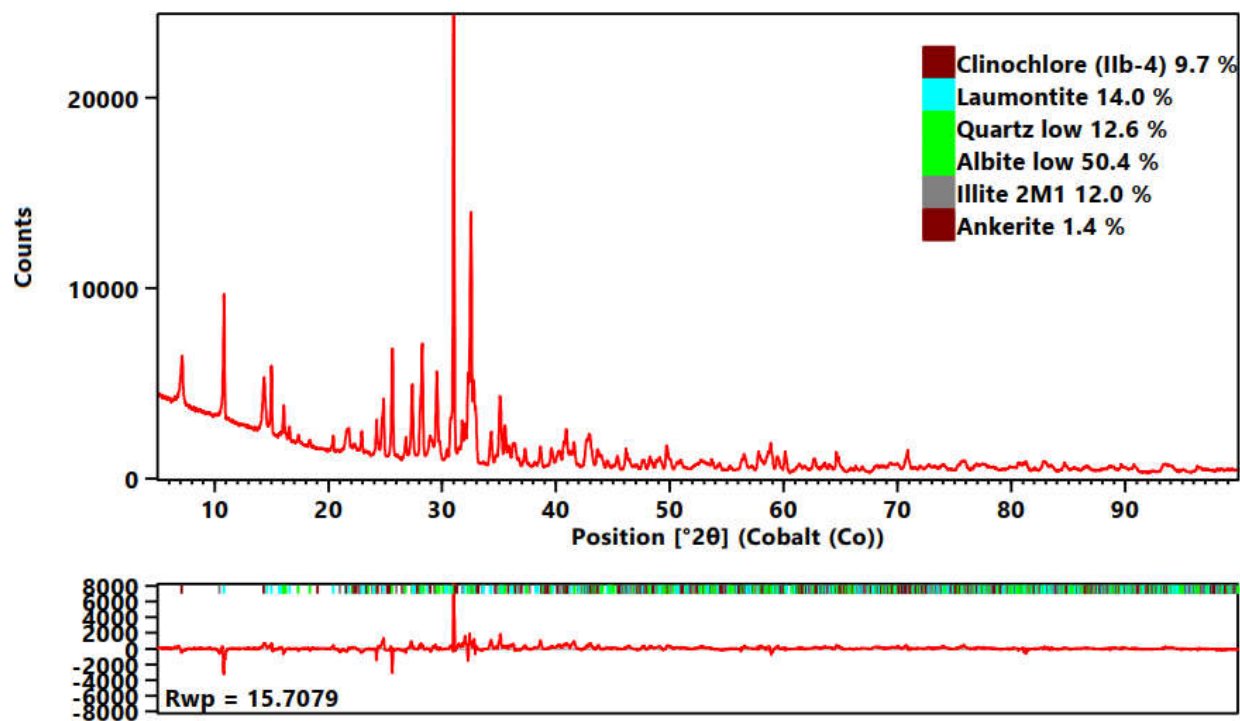

**Figure S1.** XRD from powder samples of the basaltic andesite sample and the difference plot from the Rietveld refinement with the associated mineral identification.

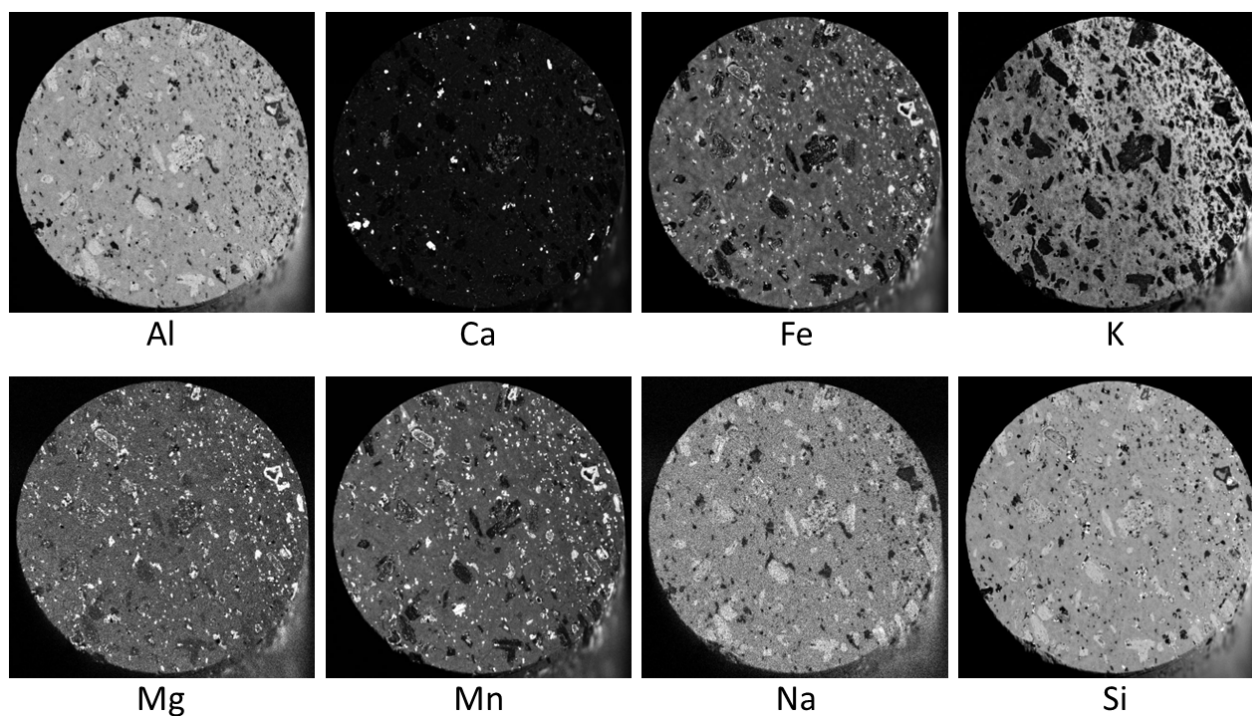

**Figure S2.**  $\mu$ XRF maps from the top surface of the training data shown with greyscale intensities.

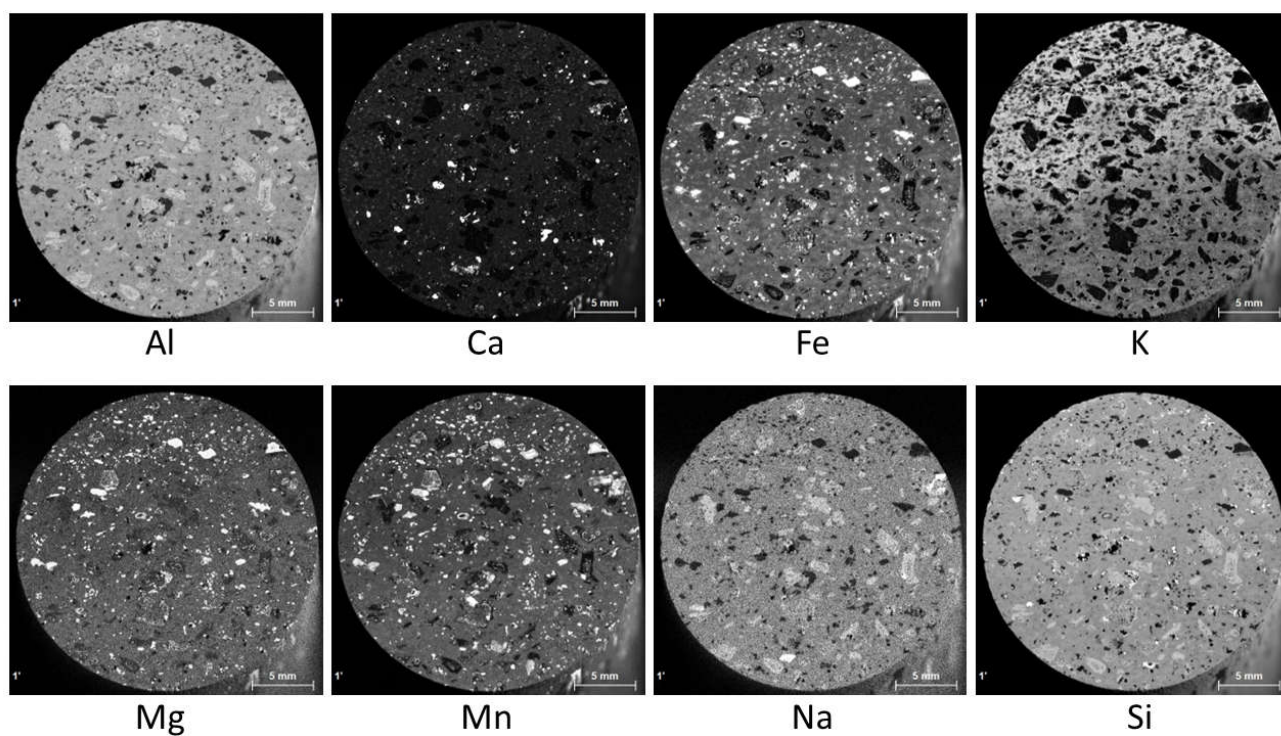

**Figure S3.**  $\mu$ XRF maps from the bottom surface of the validation data shown with greyscale intensities.

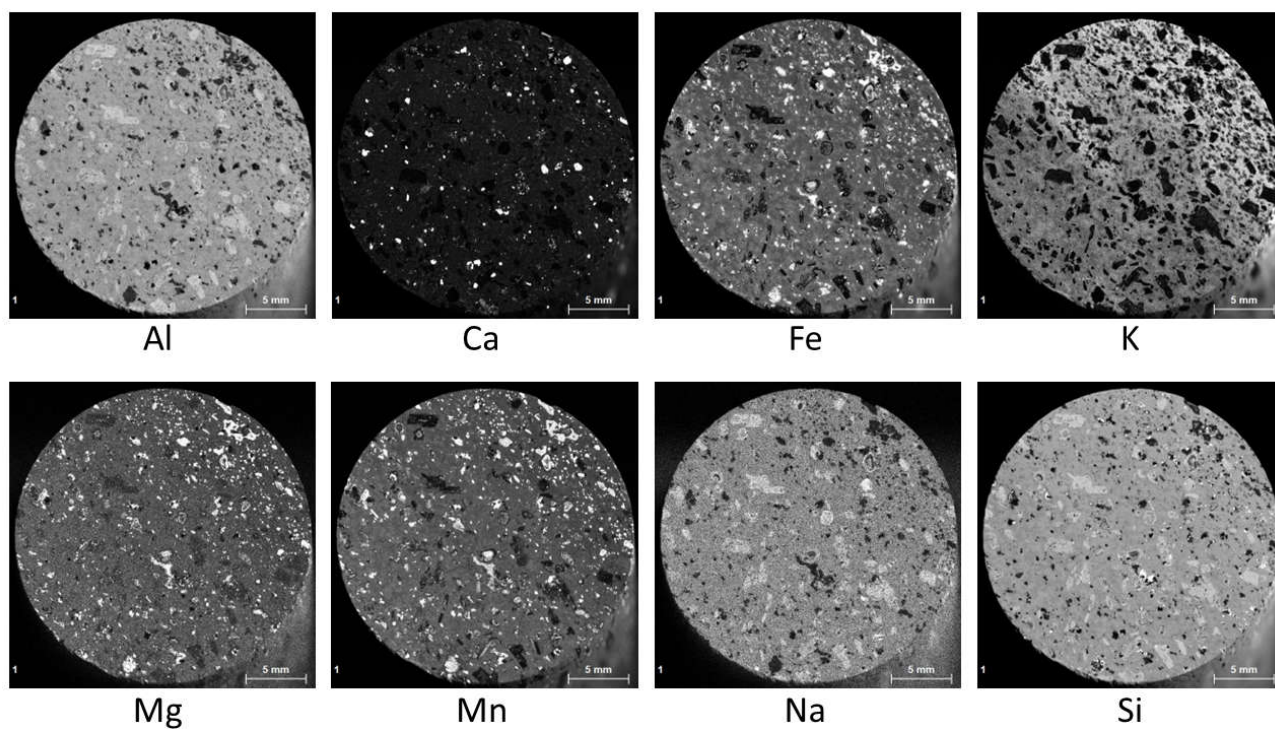

**Figure S4.**  $\mu$ XRF maps from the top surface of the validation data shown with greyscale intensities.

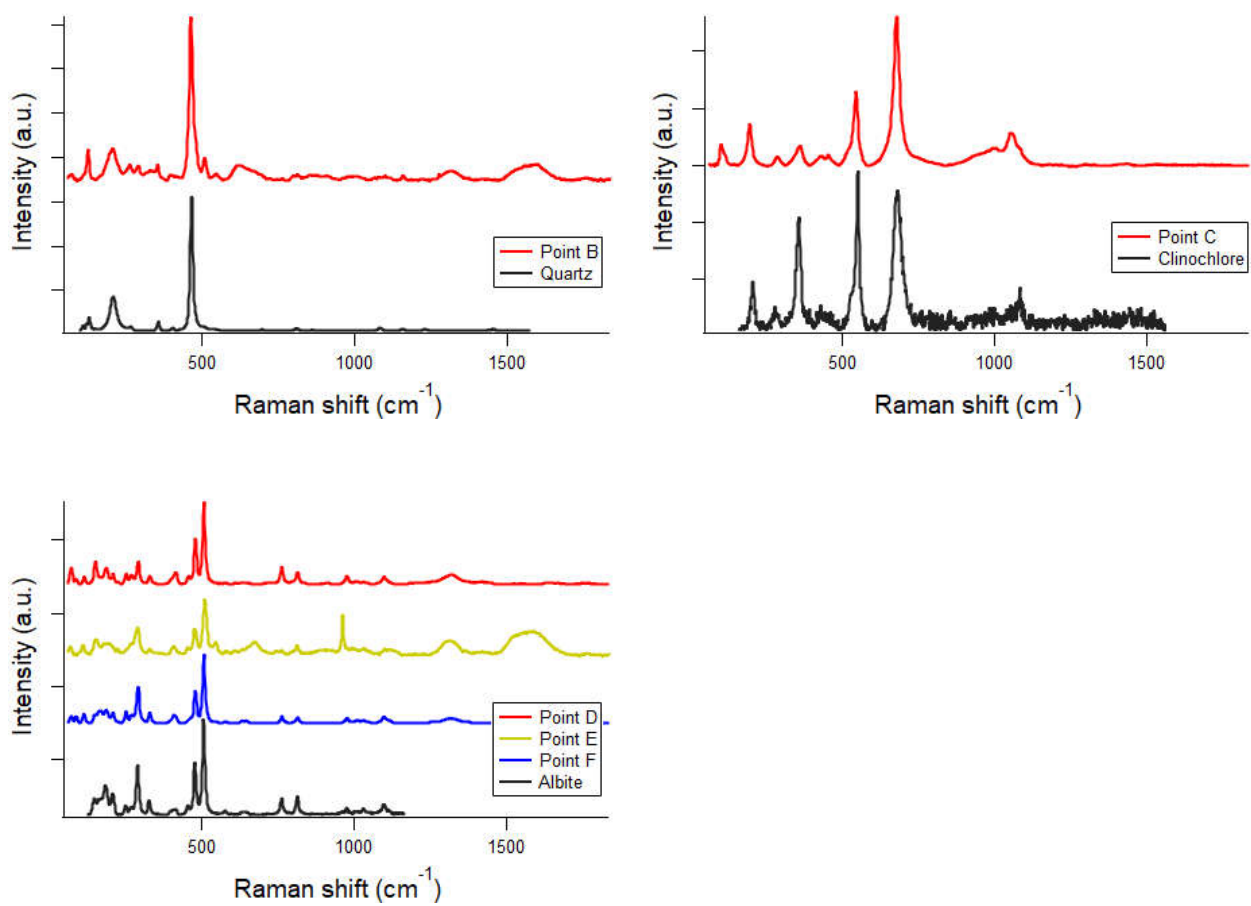

**Figure S5.** Raman spectra for quartz, clinocllore and albite shown in black plots with the spectra from their respective spots originating in Figure 2. Note that Point A is not included as there was no mineral match with the spectra.
